# Supplementary material for: Aquaporin-7-Mediated Glycerol Permeability Is Linked to Human Sperm Motility in Asthenozoospermia and during Sperm Capacitation
Source: MDPI journal article supplement (doi:10.3390/cells12152003), 2023-08-05
Supplement: s1 [file s1]

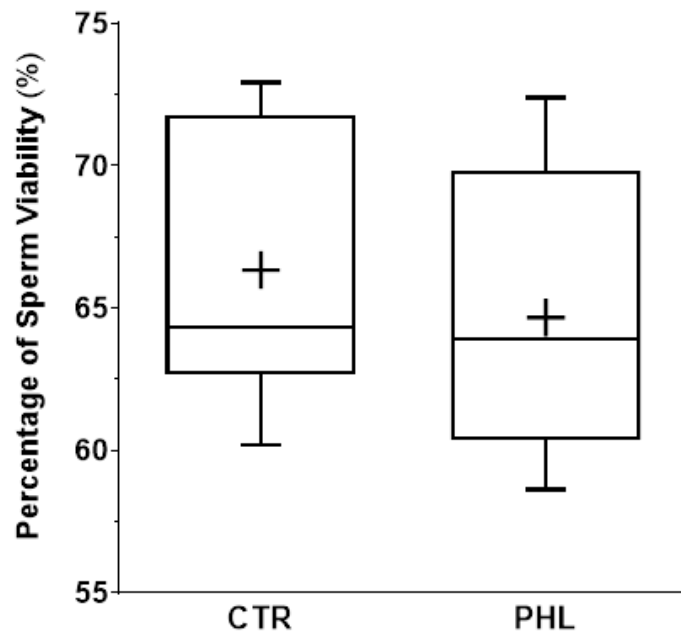

Figure S1: Percentage of sperm viability after incubation of isosmotic medium with and without phloretin (PHL) for 10 minutes. N=12

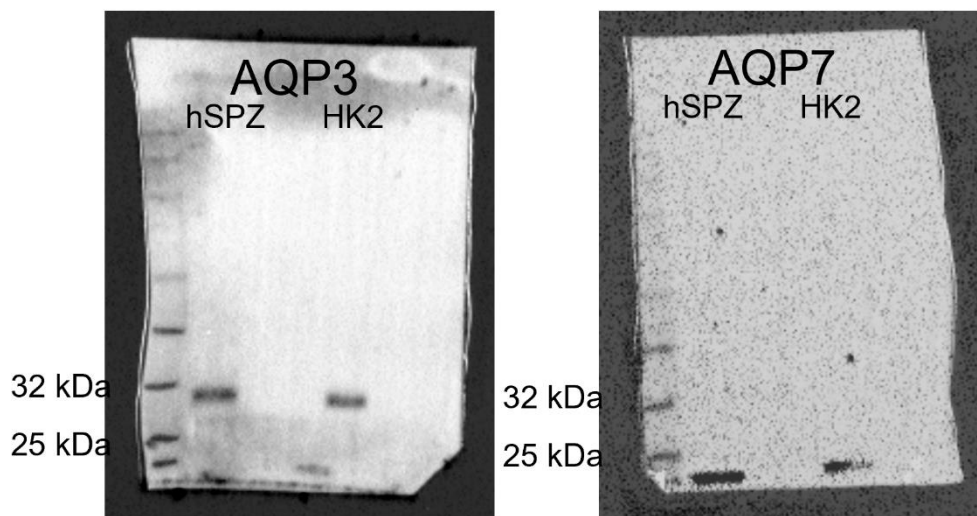

Figure S2: Representative blots of immunodetection of AQP3 and AQP7 in human spermatozoa (hSPZ) and human kidney cell line (HK2) for antibody specificity validation.
